# Supplementary material for: Response of intestinal Gα subunits to nanopolystyrene in nematodeCaenorhabditis elegans
Source: Royal Society of Chemistry journal article supplement (doi:10.1039/d0en00561d), 2020-01-01
Supplement: d0en00561d1.pdf [file d0en00561d1.pdf]

**Supporting Information:**

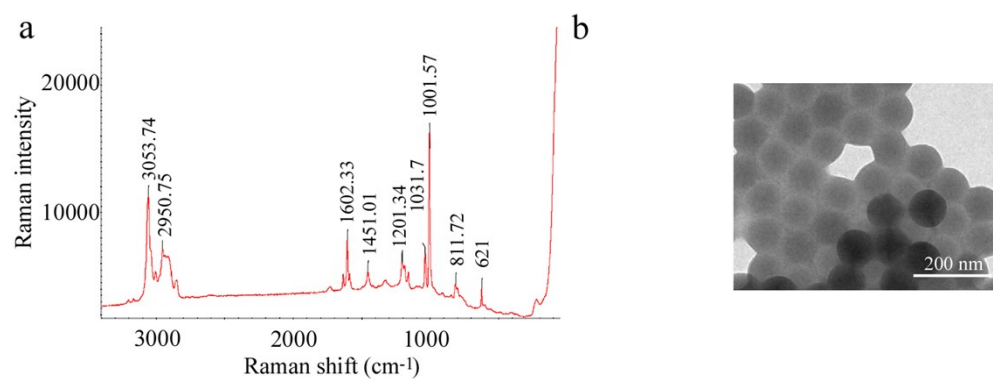

**Figure S1.** Properties of nanopolystyrene. (a) Raman spectroscopy of nanopolystyrene particles. (b) TEM image of nanopolystyrene particles in K medium before the sonication.

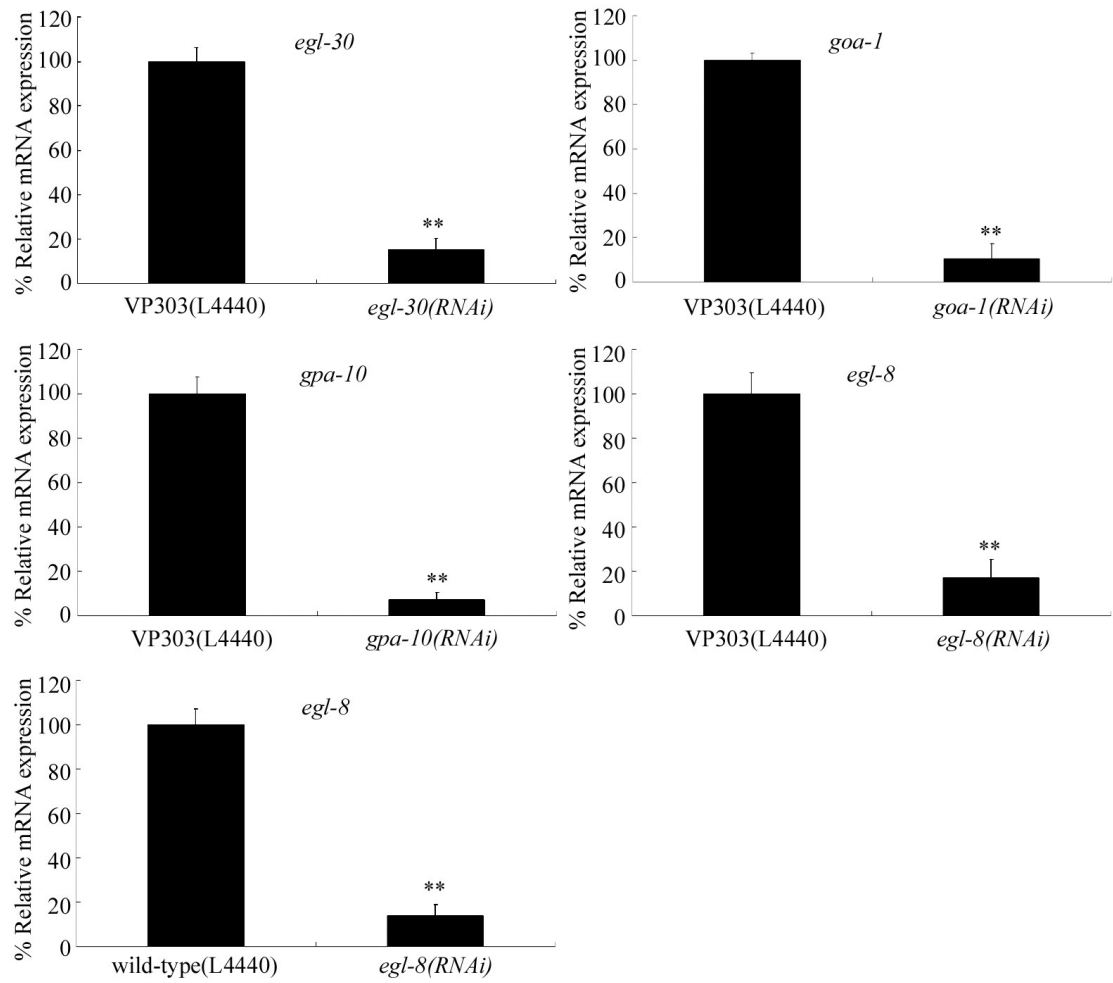

**Figure S2.** RNAi efficiency confirmed by qRT-PCR. L4440, empty vector. Bars represent means  $\pm$  SD. \*\* $P < 0.01$  vs VP303 or wild-type.

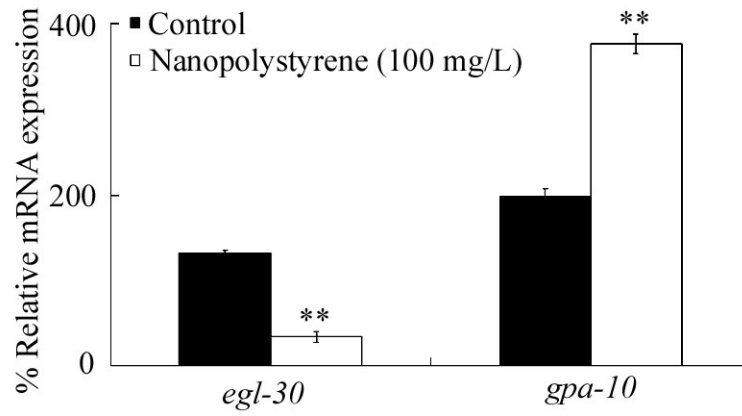

**Figure S3.** Effect of exposure to nanopolystyrene (100 mg/L) on expressions of *egl-30* and *gpa-10* in wild-type nematodes. Exposure was performed from L1-larvae to adult day-3. Bars represent means  $\pm$  SD. \*\* $P < 0.01$  vs Control.

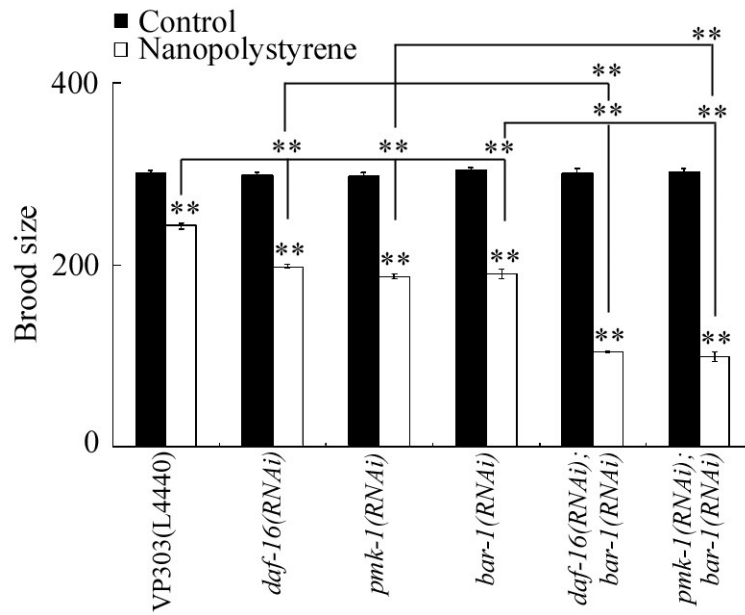

**Figure S4.** Genetic interaction between BAR-1 and PMK-1 or DAF-16 in the intestine to regulate the toxicity of nanopolystyrene in reducing brood size. L4440, empty vector. Exposure concentration of nanopolystyrene was 1  $\mu\text{g/L}$ . Exposure was performed from L1-larvae to adult day-3. Bars represent means  $\pm$  SD.  $**P < 0.01$  vs Control (if not specially indicated).

**Table S1.** Primer information for qRT-PCR

| Gene          | Forward primer (5'-3') | Reverse primer (5'-3') |
|---------------|------------------------|------------------------|
| <i>egl-30</i> | TGGCCTGCTGTTTATCCGAA   | CGAATGTGTGCTCGCTTGTC   |
| <i>goa-1</i>  | AAGCCCGTTAACGATCTGCT   | AATACAAGCCGCATCCACGA   |
| <i>gpa-6</i>  | CGTCGCTTTCGATTTCGCATT  | CCATTTCCGACGTTTCGCTTC  |
| <i>gpa-7</i>  | GTTGGAGGGCAACGATCAGA   | ACGGTCAATGGTGATCGGAC   |
| <i>gpa-10</i> | ACCTGAACTCGCCGATACAC   | GTGCAACTCCCGTTGTAGGT   |
| <i>gpa-12</i> | AACGACGCTGCGATTAGAAA   | CCGCCAACATCAATGAACCT   |
| <i>gpa-17</i> | AACGGTGTGGACAAGAGTG    | GAGCATCAGTTGCCTGAGTA   |
| <i>gsa-1</i>  | TGTGCGACAGAACAACACTAC  | ATGACACGACACCGAAGGAT   |
| <i>egl-8</i>  | AACAGCAGCAAACCAACGTC   | TTCACGAGAGATCGGACCCT   |
| <i>age-1</i>  | ATGGAAACCGCCGAGTGT     | ATTGGCAGTCGGTTCAGG     |
| <i>daf-16</i> | AGGTGTTACACGTGGCCAAT   | TGGCTTCTTACGACAACGCT   |
| <i>bar-1</i>  | ATGTGACTCCGTGGTTAG     | ACTCCTTGTTATGCCTGT     |
| <i>pmk-1</i>  | CRACTCCACGAGAAGGAT     | ATATGTACGACGGGCATG     |
| <i>mdt-15</i> | AGCGAAGAGGATTGGCCTTC   | CCAGCCGGAGTGTTTCCTAA   |
| <i>sbp-1</i>  | ACCGTACCCGGAACCAATTC   | TCCCTTCCCAGAAAAGCGTC   |
| <i>tba-1</i>  | TCAAACTGCCATCGCCGCC    | TCCAAGCGAGACCAGGCTTCAG |

**Table S2.** Primer information for DNA constructs

| Gene                          | Forward primer (5'-3')          | Reverse primer (5'-3')          |
|-------------------------------|---------------------------------|---------------------------------|
| <i>Pges-1</i>                 | ATATCTAGAAGCCACTCAGCCACTT<br>CA | ATAGGATCCCATCTGAATTCAA<br>AGATA |
| <i>egl-30/<br/>M01D7.7a.1</i> | ATACCCGGGTCCATTTGATTTGG         | GCAGGTACCGAGGAAAATGAG<br>AAAATA |

**Table S3.** Expression patterns of genes encoding G $\alpha$  subunits (<https://www.wormbase.org>)

| Genes         | Intestine | Neurons | Germline | Muscle |
|---------------|-----------|---------|----------|--------|
| <i>egl-30</i> | +         | +       |          |        |
| <i>goa-1</i>  | +         | +       |          |        |
| <i>gpa-1</i>  |           | +       |          |        |
| <i>gpa-2</i>  |           | +       |          | +      |
| <i>gpa-3</i>  |           | +       |          |        |
| <i>gpa-4</i>  |           | +       |          |        |
| <i>gpa-5</i>  |           | +       |          |        |
| <i>gpa-6</i>  | +         |         |          |        |
| <i>gpa-7</i>  | +         | +       |          | +      |
| <i>gpa-8</i>  |           | +       |          |        |
| <i>gpa-9</i>  |           | +       |          |        |
| <i>gpa-10</i> | +         | +       |          |        |
| <i>gpa-11</i> |           | +       |          |        |
| <i>gpa-12</i> | +         | +       |          | +      |
| <i>gpa-13</i> |           | +       |          |        |
| <i>gpa-14</i> |           | +       |          |        |
| <i>gpa-15</i> |           |         | +        |        |
| <i>gpa-16</i> |           |         | +        |        |
| <i>gpa-17</i> | +         |         |          |        |
| <i>gsa-1</i>  | +         | +       |          | +      |
| <i>odr-3</i>  |           | +       |          |        |
